# Supplementary material for: Structure-Property Relationship on the Example of Gas Separation Characteristics of Poly(Arylene Ether Ketone)s and Poly(Diphenylene Phtalide)
Source: MDPI journal article supplement (doi:10.3390/membranes11090677), 2021-08-31
Supplement: s1 [file s1]

*Supplementary Material*

# Structure-Property Relationship on the Example of Gas Separation Characteristics of Poly(Arylene Ether Ketone)s and Poly(Diphenylene Phtalide)

Alexandre Alentiev <sup>1,\*</sup>, Sergey Chirkov <sup>1</sup>, Roman Nikiforov <sup>1</sup>, Mikhail Buzin <sup>2</sup>, Oleg Miloserdov <sup>3</sup>, Victoria Ryzhikh <sup>1</sup>, Nikolay Belov <sup>1</sup>, Vera Shaposhnikova <sup>2</sup>, and Sergey Salazkin <sup>2</sup>

<sup>1</sup> A.V. Topchiev Institute of Petrochemical Synthesis, Russian Academy of Sciences (TIPS RAS), 119991 Moscow, Russia

<sup>2</sup> A.N.Nesmeyanov Institute of Organoelement Compounds, Russian Academy of Sciences (INEOS RAS), 119334 Moscow, Russia

<sup>3</sup> V.A. Trapeznikov Institute of Control Sciences, Russian Academy of Sciences (ICS RAS), 117997 Moscow, Russia

\* Correspondence: alentiev@ips.ac.ru; Tel.: +7 916 201 68 55

**Table S1.** Chemical shifts and signal multiplicity in  $^1\text{H}$  NMR spectra for samples C1–C4.

| $\delta_{\text{H}}$ , ppm                                                                                                                                                                                                                                                                                                  |                                                                                                                                                                                                                                                                                                      |                                                                                                                                                                                                                                                                                                                                                                                                                                                                                                               |                                                                                                                                                                                                                                                                                                                                                                        |
|----------------------------------------------------------------------------------------------------------------------------------------------------------------------------------------------------------------------------------------------------------------------------------------------------------------------------|------------------------------------------------------------------------------------------------------------------------------------------------------------------------------------------------------------------------------------------------------------------------------------------------------|---------------------------------------------------------------------------------------------------------------------------------------------------------------------------------------------------------------------------------------------------------------------------------------------------------------------------------------------------------------------------------------------------------------------------------------------------------------------------------------------------------------|------------------------------------------------------------------------------------------------------------------------------------------------------------------------------------------------------------------------------------------------------------------------------------------------------------------------------------------------------------------------|
| C1 [1]                                                                                                                                                                                                                                                                                                                     | C2                                                                                                                                                                                                                                                                                                   | C3 [1]                                                                                                                                                                                                                                                                                                                                                                                                                                                                                                        | C4 [2]                                                                                                                                                                                                                                                                                                                                                                 |
| 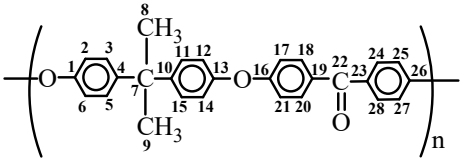                                                                                                                                                                                                                                          |                                                                                                                                                                                                                    |                                                                                                                                                                                                                                                                                                                                                                                                                            |                                                                                                                                                                                                                                                                                     |
| 1.72 s, 6 H, H(8), H(9),<br>7.00 d, 4 H, H (2), H(6), H(12), H(14), $^3J_{\text{H-H}}=8.3$ Hz;<br>7.03 d, 4 H, H (17), H(21),<br>H(25), H(27), $^3J_{\text{H-H}}=8.3$ Hz;<br>7.28 d, 4 H, H (3), H(5), H(11), H(15), $^3J_{\text{H-H}}=8.3$ Hz;<br>7.79 d, 4 H, H (18), H(20), H(24), H(28),<br>$^3J_{\text{H-H}}=8.3$ Hz; | 7.11 d, 4 H, H (2), H(6), H(12), H(14),<br>$^3J_{\text{H-H}}=8.0$ Hz;<br>7.13 d, 4 H, H (17), H(21),<br>H(25), H(27), $^3J_{\text{H-H}}=8.0$ Hz;<br>7.46 d, 4 H, H (3), H(5), H(11), H(15),<br>$^3J_{\text{H-H}}=8.0$ Hz;<br>7.88 d, 4 H, H (18), H(20), H(24),<br>H(28), $^3J_{\text{H-H}}=8.0$ Hz; | 7.02 d, 4 H, H(2), H(6), H(17), H(19),<br>$^3J_{\text{H-H}}=8.8$ Hz;<br>7.04 d, 4 H, H (22), H(26), H(30),<br>H(32), $^3J_{\text{H-H}}=8.8$ Hz;<br>7.37 d, 4 H, H (3), H(5), H(16), H(20),<br>$^3J_{\text{H-H}}=8.8$ Hz;<br>7.58 t, 1 H, H (13), $^3J_{\text{H-H}}=7.6$ Hz;<br>7.60 d, 1 H, H (9), $^3J_{\text{H-H}}=7.6$ Hz;<br>7.73 t, 1 H, H (8), $^3J_{\text{H-H}}=7.6$ Hz;<br>7.77 d, 4 H, H (23), H(25), H(29),<br>H(33), $^3J_{\text{H-H}}=8.8$ Hz;<br>7.95 d, 1 H, H (12), $^3J_{\text{H-H}}=7.6$ Hz; | 7.43 d, 4 H, H(10), H(14), H(17),<br>H(19), $^3J_{\text{H-H}}=8.3$ Hz;<br>7.52 d, 4 H, H(11), H(13), H(16),<br>H(20), $^3J_{\text{H-H}}=8.3$ Hz;<br>7.58 dd, 1 H, H (7), $^3J_{\text{H-H}}=7.6$ ; 7.7 Hz;<br>7.63 d, 1 H, H (3), $^3J_{\text{H-H}}=7.7$ Hz;<br>7.73 dd, 1 H, H (2), $^3J_{\text{H-H}}=7.6$ ; 7.7 Hz;<br>7.96 d, 1 H, H (6), $^3J_{\text{H-H}}=7.7$ Hz; |

**Table S2.** Chemical shifts and signal multiplicity in  $^{13}\text{C}$  NMR spectrum for samples C1-C4.

| Atom* |        |        |        |        |
|-------|--------|--------|--------|--------|
|       | C1 [1] | C2     | C3 [1] | C4 [2] |
| C(1)  | 161.04 | 160.10 | 155.91 | 91.28  |
| C(2)  | 118.37 | 118.90 | 117.55 | 134.41 |
| C(3)  | 131.65 | 132.36 | 128.76 | 126.21 |
| C(4)  | 146.36 | 128.80 | 132.43 | 151.73 |
| C(5)  | 131.65 | 132.36 | 128.76 | 125.52 |
| C(6)  | 118.37 | 118.90 | 117.55 | 124.17 |
| C(7)  | 41.98  | 63.87  | 90.72  | 129.62 |
| C(8)  | 30.68  | 122.70 | 134.24 | 196.62 |
| C(9)  | 30.68  | 122.70 | 123.82 | 140.11 |
| C(10) | 146.36 | 128.80 | 151.54 | 127.67 |
| C(11) | 131.65 | 132.36 | 125.22 | 127.26 |
| C(12) | 118.37 | 118.90 | 129.46 | 140.52 |
| C(13) | 161.04 | 160.10 | 126.00 | 127.26 |
| C(14) | 118.37 | 118.90 | 169.24 | 127.67 |
| C(15) | 131.65 | 132.36 | 132.43 | 140.52 |
| C(16) | 153.07 | 156.65 | 128.76 | 127.26 |
| C(17) | 114.68 | 118.32 | 117.55 | 127.67 |
| C(18) | 127.39 | 132.00 | 155.91 | 140.11 |
| C(19) | 131.77 | 133.04 | 117.55 | 127.67 |
| C(20) | 127.39 | 132.00 | 128.76 | 127.26 |
| C(21) | 114.68 | 118.32 | 160.33 |        |
| C(22) | 193.69 | 194.12 | 119.40 |        |
| C(23) | 131.77 | 133.04 | 132.04 |        |
| C(24) | 127.39 | 132.00 | 136.39 |        |
| C(25) | 114.68 | 118.32 | 132.04 |        |
| C(26) | 153.07 | 156.65 | 119.40 |        |
| C(27) | 114.68 | 118.32 | 193.84 |        |

|       |        |        |        |  |
|-------|--------|--------|--------|--|
| C(28) | 127.39 | 132.00 | 136.39 |  |
| C(29) |        |        | 132.04 |  |
| C(30) |        |        | 119.40 |  |
| C(31) |        |        | 160.33 |  |
| C(32) |        |        | 119.40 |  |
| C(33) |        |        | 132.04 |  |

\* See Table S1 for the designation of atoms.

- [1] Shaposhnikova, V. V.; Salazkin, S. N.; Donetskii, K. I.; Gorshkov, G. V.; Sharapov, D. S.; Mamedova, I. A.; Petrovskii, P. V.; Askadskii, A. A.; Bychko, K. A.; Kazantseva, V. V.; Krasnov, A. P.; Afonicheva, O. V. Synthesis and Properties of Cardo Copoly(Arylene Ether Ketones). *Polymer Science - Series A* **2002**, *44* (6), 563–569.
- [2] Fatykhov, A. A.; Sedova, E. A.; Egorov, A. E.; Salazkin, S. N.; Kraikin, V. A. NMR Study of Phthalide-Type Poly(Phenylene)s. Symmetry and Additivity: NMR Study of Phthalide-Type Poly(Phenylene)s. Symmetry and Additivity. *Magn. Reson. Chem.* **2017**, *55* (10), 958–966. <https://doi.org/10.1002/mrc.4613>.
